# Supplementary material
Source: HighWire-hosted journal article supplement (https://jnis.bmj.com/content/11/4/328)
Supplement: inline-supplementary-material-1 [file inline-supplementary-material-1.docx]

**Supplemental Table. Baseline characteristics and main angiographic and clinical outcomes in patients from the two trials**

| Characteristics | ASTER  (n=125) | THRACE  (n=92) |
| --- | --- | --- |
| Demographics |  |  |
| Age, years, mean (SD) | 66.7 (15.8) | 62.1 (13.7) |
| Men | 64/125 (51.2) | 41/92 (44.6) |
| Medical history |  |  |
| Hypertension | 72/123 (58.5) | 40/90 (44.4) |
| Diabetes | 25/124 (20.2) | 5/91 (5.5) |
| Hypercholesterolemia | 46/123 (37.4) | 33/81 (40.7) |
| Current smoking | 21/108 (19.4) | 20/80 (25.0) |
| Coronary artery disease | 23/125 (18.5) | 7/88 (8.0) |
| Current stroke event |  |  |
| SVS (+) | 84/125 (67.2) | 81/92 (88.0) |
| Systolic blood pressure, mmHg, mean (SD)1 | 141 (125 to 156) | 140 (127 to 156) |
| Diastolic blood pressure, mmHg, mean (SD)1 | 80.0 (70.0 to 89.0) | 80.0 (71.5 to 90.5) |
| Glycemia, median (IQR)2 | 6.6 (5.8 to 8.3) | 6.7 (5.8 to 7.9) |
| NIHSS score, mean (SD)3 | 15.7 (6.5) | 17.7 (4.1) |
| ASPECTS, median (IQR)4 | 7 (5 to 8) | 7 (5 to 8) |
| Site of occlusion |  |  |
| M1-M2 | 105/125 (84.0) | 79/92 (85.9) |
| ICA | 20/125 (16.0) | 13/92 (14.1) |
| Intravenous rt-PA | 84/125 (67.2) | 92/92 (100.0) |
| Etiology |  |  |
| Atherothrombotic | 15/125 (12.0) | 10/87 (11.5) |
| Cardioembolic | 49/125 (39.2) | 40/87 (46.0) |
| Other or unknown causes | 61/125 (48.8) | 37/87 (42.5) |
| Favorable collaterality | 22/125 (21.6) | 14/79 (17.7) |
| Time intervals, min median (IQR) |  |  |
| Onset to groin puncture time5 | 226 (190 to 281) | 200 (170 to 235) |
| Onset to imaging6 | 116 (85 to 149) | 108 (85 to 133) |
| Onset to clot contact7 | 250 (211 to 304) | 245 (205 to 283) |
| Angiographic outcomes |  |  |
| Reperfusion at end of procedure |  |  |
| mTICI 3 | 52/125 (41.6) | 21/92 (22.8) |
| mTICI 2b/3 | 109/125 (87.2) | 66/92 (71.7) |
| Clinical outcomes |  |  |
| Modified Rankin Scale at 3 months, median (IQR) | 2 (1 to 4) | 2 (1 to 4) |
| Favorable outcome at 3 months | 72/125(57.6) | 49/92 (53.3) |
| Change NIHSS at 24 hours, median (IQR)8 | -6.5 (-13.0 to 0.0) | -7.0 (-11.0 to 0.0) |
| Emboli in other territories | 3/125 (2.40) | 4/78 (5.1) |
| Intracranial hemorrhage at 24 hours | 51/124 (41.1) | 37/92 (40.7) |

Values expressed as the no./total no. (%), unless otherwise stated. 1 2 missing values in ASTER, 2 7 missing values in ASTER, 3 1 missing value in ASTER, 4 4 missing values (2 in THRACE), 5 3 missing values (2 in THRACE), 6 2 missing values (1 in THRACE), 7 5 missing values (4 in THRACE) and 8 13 missing values (4 in THRACE).
